# Supplementary material
Source: PubMed Central journal article supplement (PMC7719050)
Supplement: NIHMS1649015-supplement-Supplemental_Material.pdf [file NIHMS1649015-supplement-Supplemental_Material.pdf]

## **SUPPLEMENTAL MATERIAL**

(Intended for publication as an online data supplement)

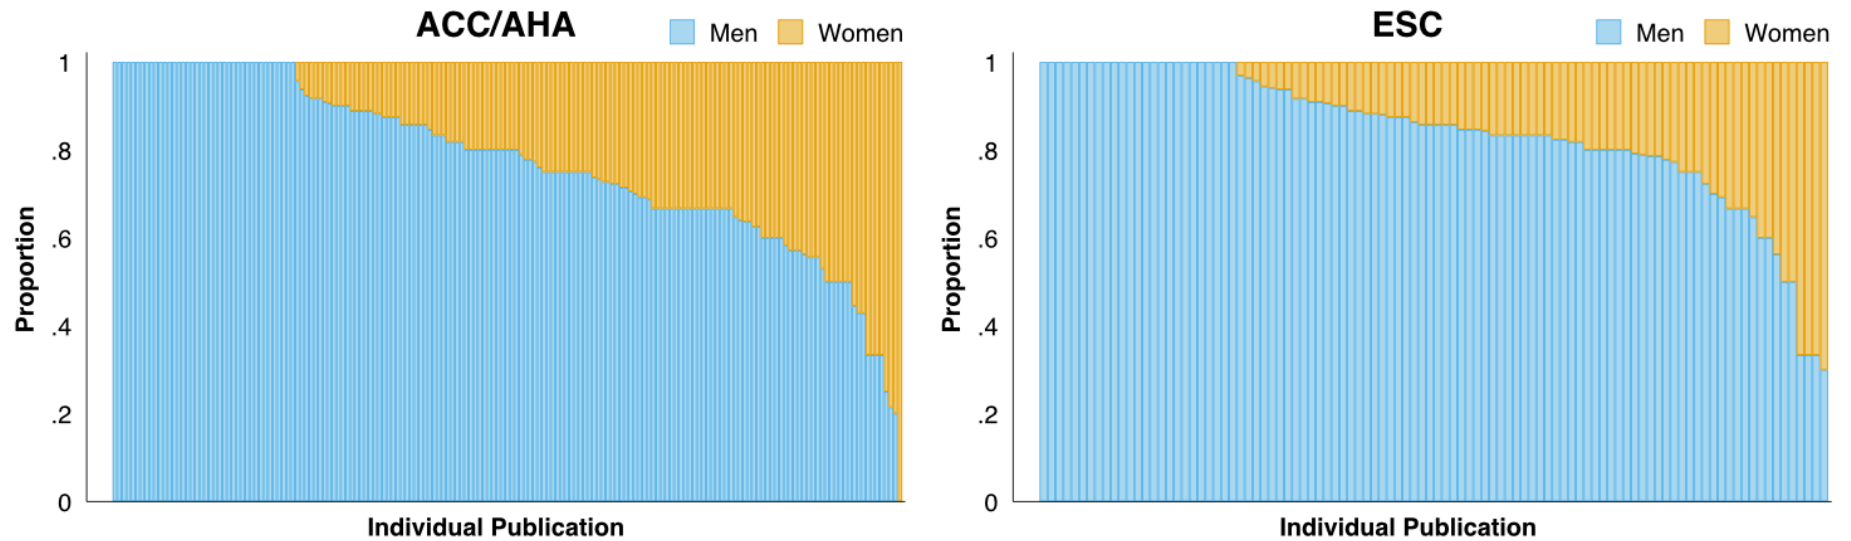

**Supplemental Figure 1.** Proportions of Men and Women Authors For Individual Publications Cited by the (A) American College of Cardiology/American Heart Association (ACC/AHA) and (B) European Society of Cardiology (ESC) Guidelines. Abbreviations: ACC/AHA = American College of Cardiology/American Heart Association; ESC = European Society of Cardiology

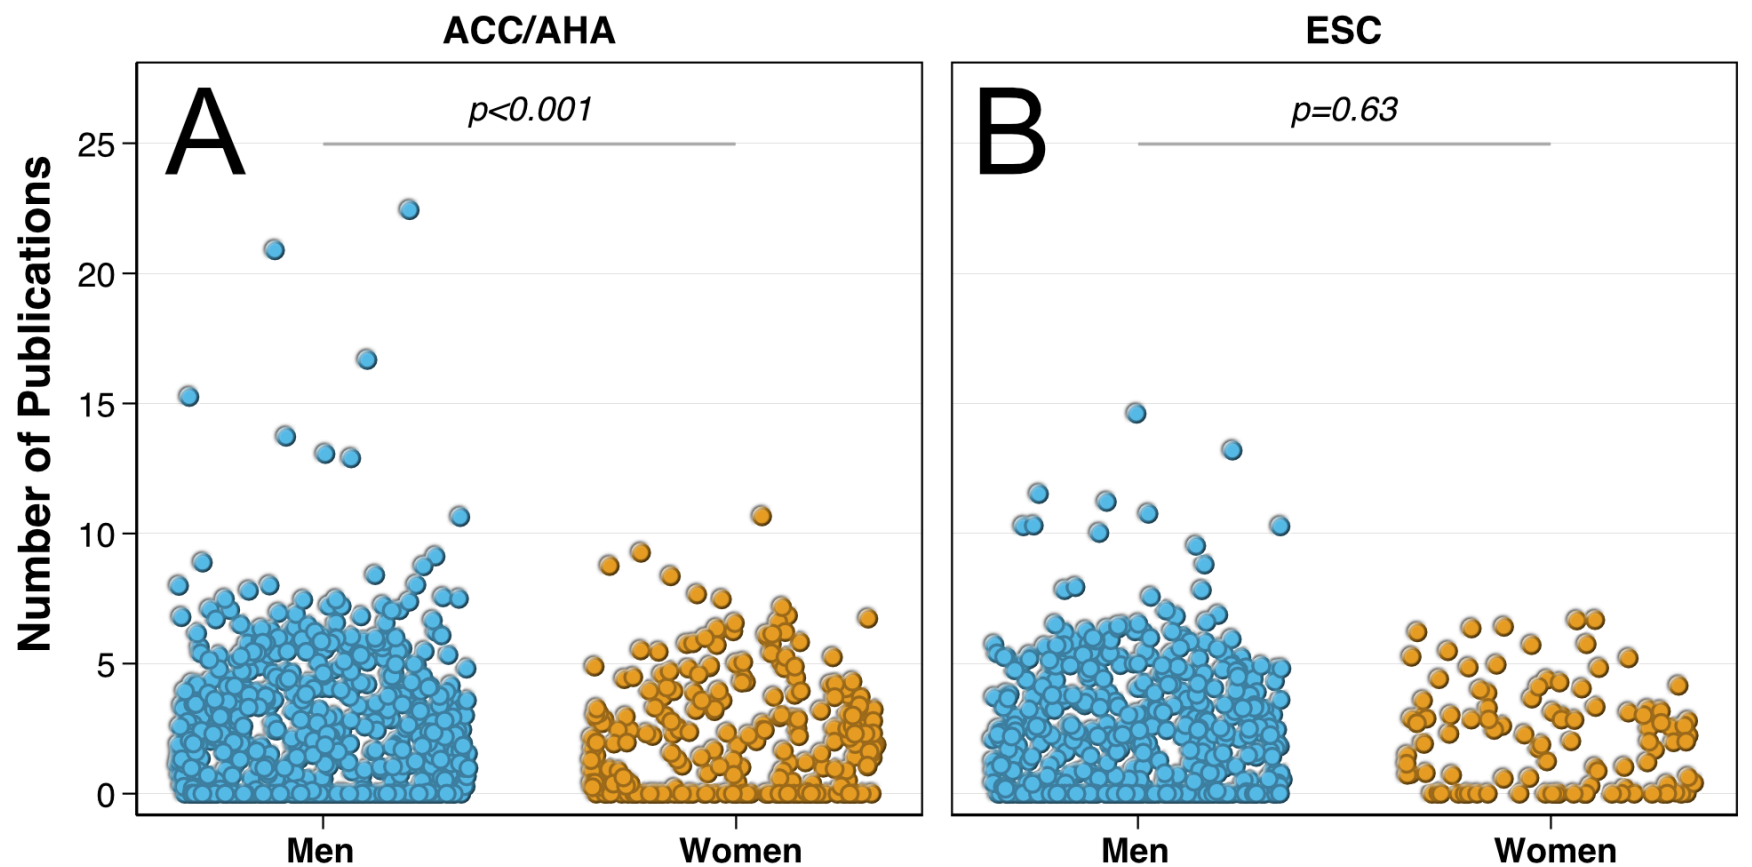

**Supplemental Figure 2.** Number of Publications per Individual Author by Gender in (A) American College of Cardiology/American Heart Association (ACC/AHA) and (B) European Society of Cardiology (ESC) Guidelines.

Abbreviations: ACC/AHA = American College of Cardiology/American Heart Association; ESC = European Society of Cardiology

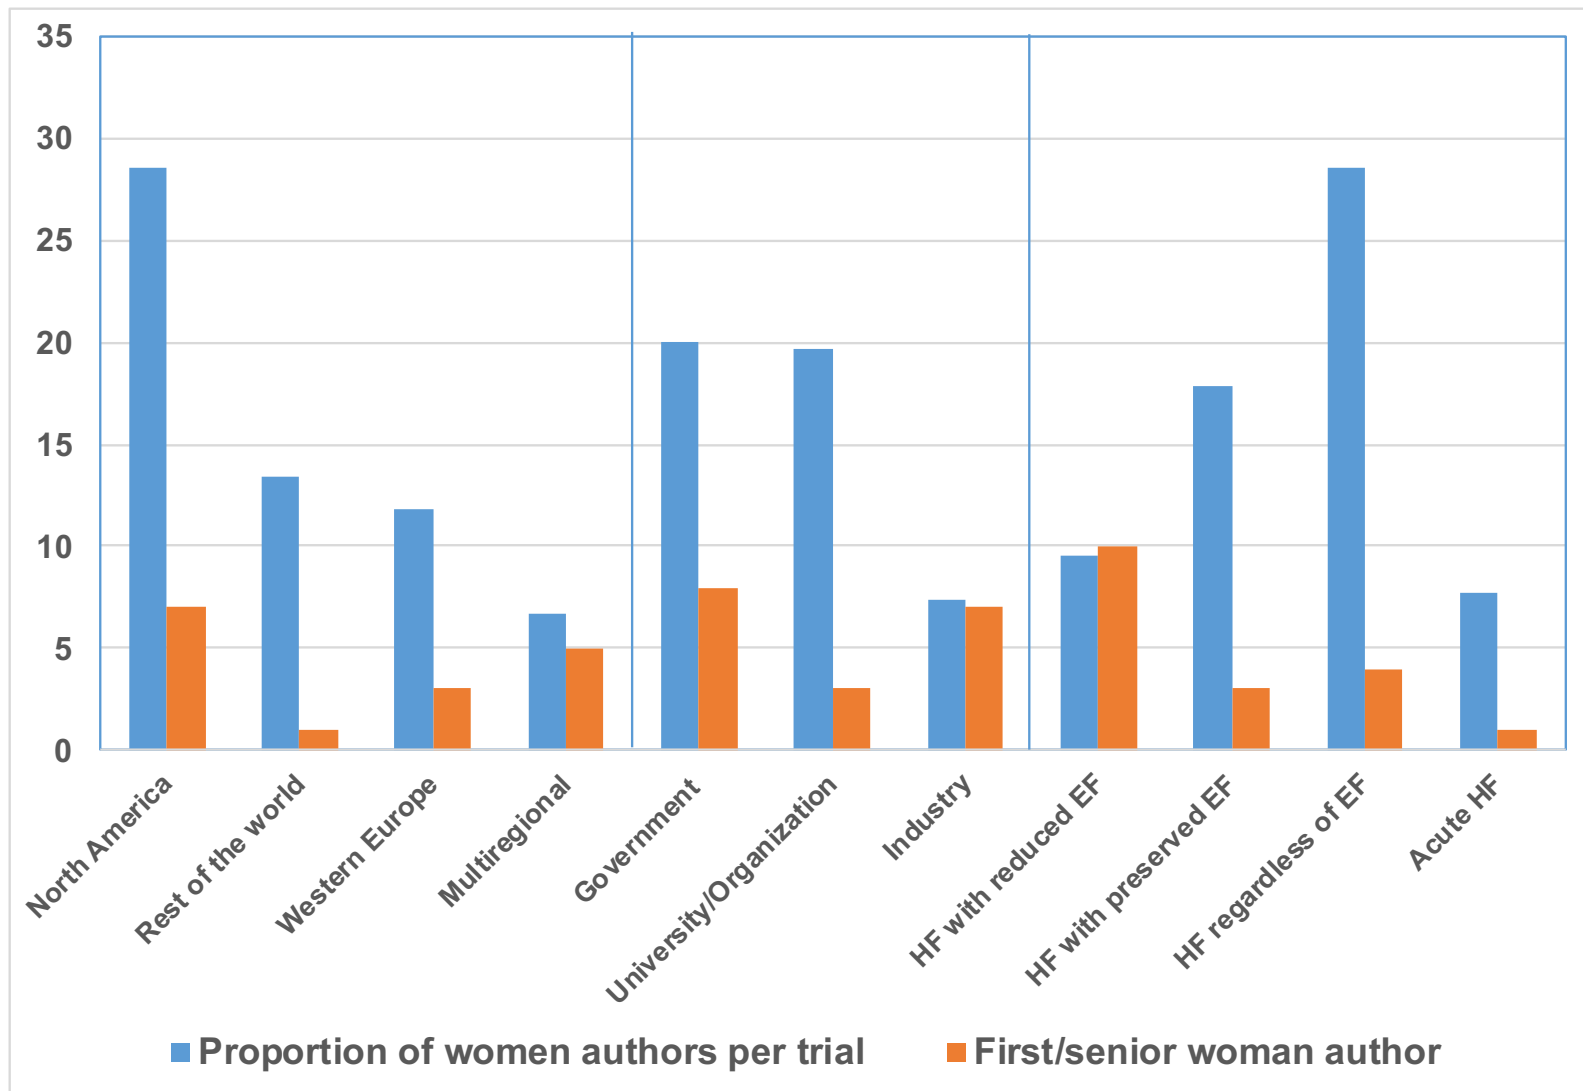

**Supplemental Figure 3.** Proportion of Women Authors in Heart Failure (HF) Clinical Trials Based on Key Trial-level Characteristics.

EF = ejection fraction
